# Supplementary material for: Dispersed MnO2 nanoparticles/sugarcane bagasse-derived carbon composite as an anode material for lithium-ion batteries
Source: Royal Society of Chemistry journal article supplement (doi:10.1039/d3ra04008a), 2024-01-01
Supplement: d3ra04008a1.pdf [file d3ra04008a1.pdf]

Supporting Information

*RSC Advances*

## Supporting Information

### **Dispersed MnO<sub>2</sub> Nanoparticle/Sugarcane Bagasse Derived Carbon Composite as the Anode Material for Lithium-ion Batteries**

K. Pongpanyanate<sup>a</sup>, S. Roddecha<sup>\*a,c</sup>, C. Piyanirund<sup>a</sup>, T. Phraewphiphat<sup>d</sup> and P. Hasin<sup>b,c</sup>

<sup>[a]</sup> Department of Chemical Engineering, Faculty of Engineering, Kasetsart University, Thailand.

<sup>[b]</sup> Department of Chemistry and Center of Excellence for Innovation in Chemistry (PERCH-CIC), Ministry of Higher Education, Science, Research and Innovation, Faculty of Science, Kasetsart University, Thailand.

<sup>[c]</sup> Kasetsart University Research and Development Institute, Kasetsart University, Thailand.

<sup>[d]</sup> National Energy Technology Center (ENTEC), 114 Thailand Science Park, Phaholyothin Road, Klong 1, Klongluang, Pathumthani, Thailand 12120.

#### **Contents**

**Part I. Material Characterization**

**Part II. Electrochemical performance assessment**

## Part I. Material Characterization

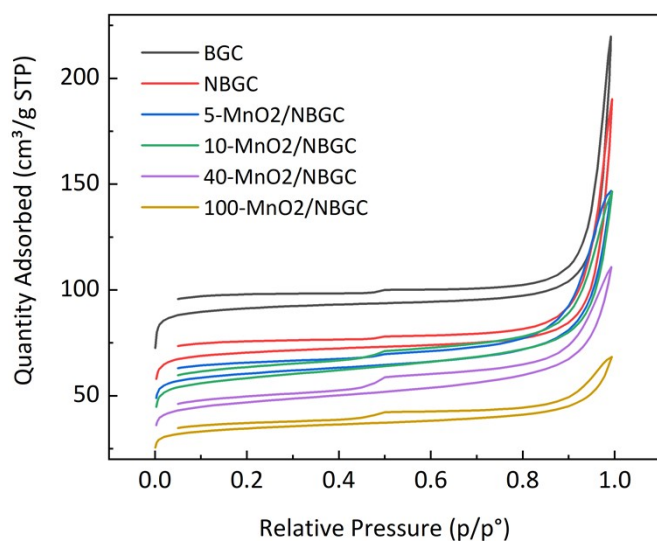

**Figure S1.** N<sub>2</sub> adsorption-desorption isotherms of BGC, NBGC, 5-MnO<sub>2</sub>/NBGC, 10-MnO<sub>2</sub>/NBGC, 40-MnO<sub>2</sub>/NBGC and 100-MnO<sub>2</sub>/NBGC

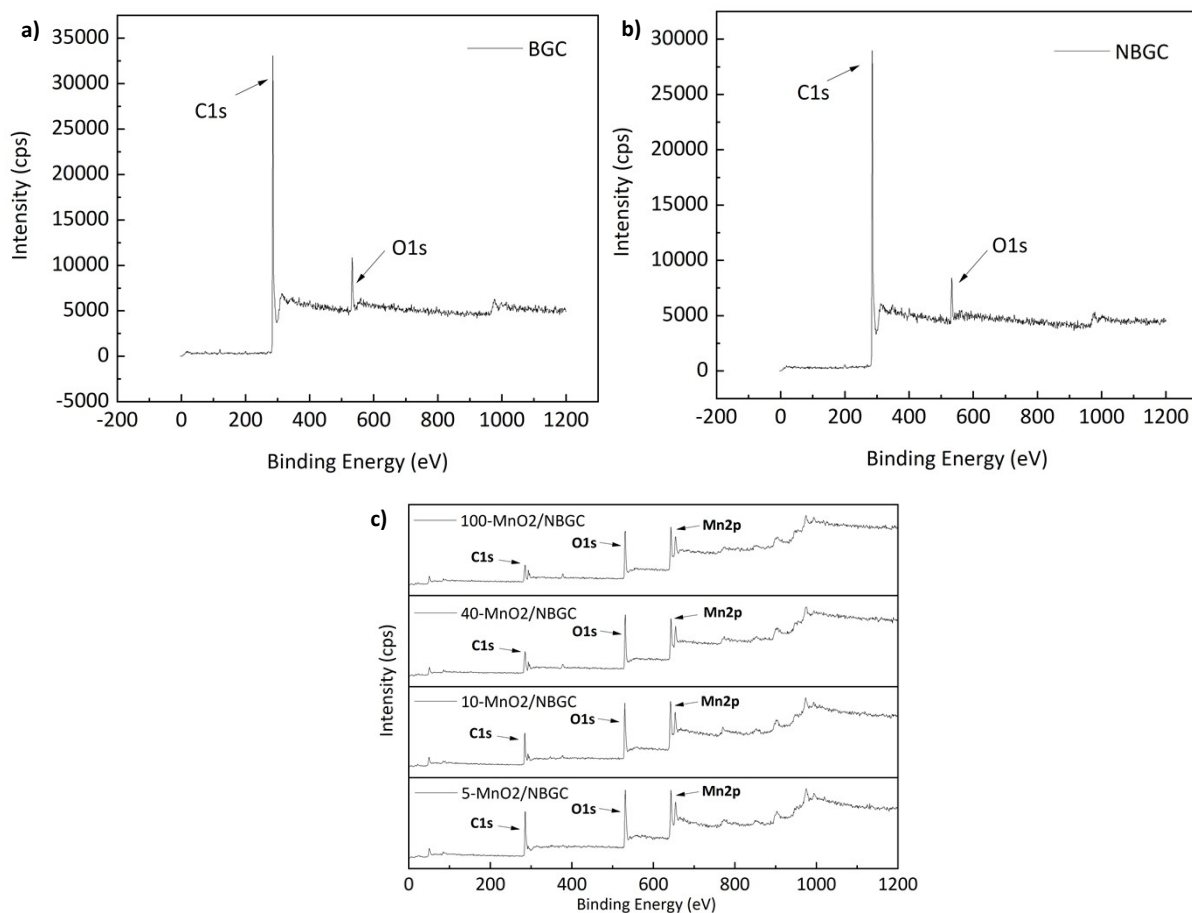

**Figure S2.** XPS scans of: a) bagasse-derived carbon material (BGC), b) N-containing bagasse-derived carbon material (NBGC), and c) MnO<sub>2</sub>/NBGC composite with various MnO<sub>2</sub> loading concentrations

**Table S1.** Elemental analysis of the bagasse-derived carbon material and the composite with MnO<sub>2</sub> nanoparticles analyzed by electron dispersive spectroscopy and C H N analyzer

| sample                     | EDS elemental mapping (wt%) |       |      |       |      |      | C H N analyzer (wt%) |      |      |
|----------------------------|-----------------------------|-------|------|-------|------|------|----------------------|------|------|
|                            | C                           | O     | N    | Mn    | Cl   | Ca   | C                    | H    | N    |
| BGC                        | 91.84                       | 6.68  |      |       |      | 1.48 | 58.56                | 0.69 | 0.43 |
| NBGC                       | 84.69                       | 8.67  | 5.01 |       |      | 0.99 | 76.01                | 1.21 | 0.87 |
| 5-MnO <sub>2</sub> /NBGC   | 70.05                       | 18.23 | 6.15 | 4.75  | 0.17 | 0.65 | 65.85                | 1.42 | 0.77 |
| 10-MnO <sub>2</sub> /NBGC  | 65.68                       | 20.28 | 6.62 | 6.77  | 0.19 | 0.46 | 60.30                | 1.20 | 0.71 |
| 40-MnO <sub>2</sub> /NBGC  | 44.24                       | 33.06 | 1.86 | 20.39 | 0.21 | 0.24 | 38.82                | 1.28 | 0.47 |
| 100-MnO <sub>2</sub> /NBGC | 44.54                       | 13.12 | 1.84 | 39.25 | 0.34 | 0.91 | 30.07                | 1.12 | 0.43 |

**Table S2.** Binding energies analyzed by X-ray photoelectron spectroscopy (XPS) of the bagasse-derived carbon material and MnO<sub>2</sub>/NBGC composites.

| peak position | position BE (eV) |      |                          |                           |                           |                            |
|---------------|------------------|------|--------------------------|---------------------------|---------------------------|----------------------------|
|               | BGC              | NBGC | 5-MnO <sub>2</sub> /NBGC | 10-MnO <sub>2</sub> /NBGC | 40-MnO <sub>2</sub> /NBGC | 100-MnO <sub>2</sub> /NBGC |
| C1s           | 285              | 285  | 285                      | 285                       | 285                       | 285                        |
| O1s           | 533              | 533  | 531                      | 530                       | 531                       | 531                        |
| Mn2p          |                  |      | 644                      | 642                       | 643                       | 643                        |
| Mn2p3/2       |                  |      | 643                      | 643                       | 642                       | 642                        |
| Mn2p1/2       |                  |      | 654                      | 654                       | 654                       | 654                        |

## Part II. Electrochemical performance assessment

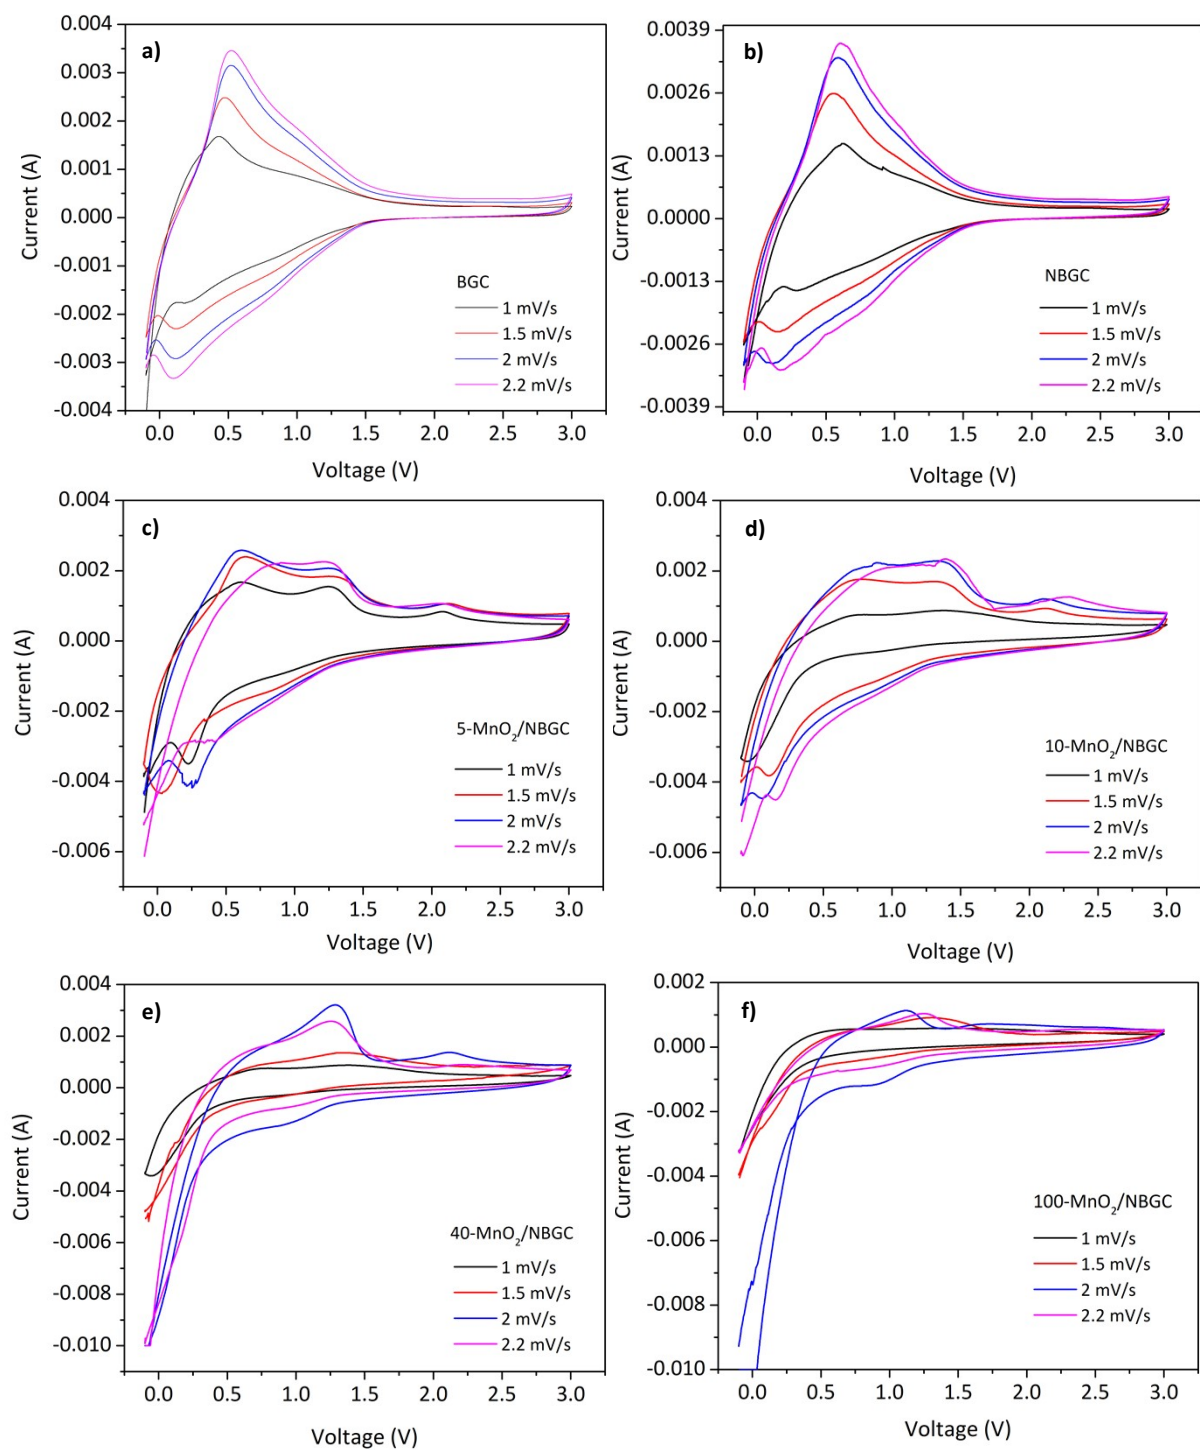

**Figure S3.** Cyclic voltametric scans (CVs) at various scan rates of: a) BGC, b) NBGC, c) 5-MnO<sub>2</sub>/NBGC, d) 10-MnO<sub>2</sub>/NBGC, e) 40-MnO<sub>2</sub>/NBGC, f) 100-MnO<sub>2</sub>/NBGC

#### S4. Energy density calculation

Energy density at the electrode level for the full cell including current collector can basically be approximated based on the following formulation<sup>1</sup>.

$$\text{Full-cell gravimetric energy density} = \frac{\text{SE in material level} \times \text{Active material ratio} \times \text{Mass loading (cathode)}}{\text{Mass loading (Cathode+Anode) + Areal Weight (Al+Cu) foil}} \times \text{Nominal voltage}$$

In case of the LFP-the proposed 5-MnO<sub>2</sub>/NBGC full-cell, the gravimetric energy density can be calculated as:

$$\begin{aligned} \text{LFP-5MnO}_2/\text{NBGC gravimetric energy density} &= 155 \text{ mAh/g}^a \times 80\%^b \times \frac{12.36 \text{ mg.cm}^{-2}}{(12.36^c + 12.36^c) \text{ mg.cm}^{-2} + (6.97^d + 1.77^e) \text{ mg.cm}^{-2}} \times 3.45^f - 0.45^g \text{ V} \\ &= 137.42 \text{ Ah/kg} \end{aligned}$$

For the LFP-graphite full-cell, the gravimetric energy density can be calculated as:

$$\begin{aligned} \text{LFP-graphite gravimetric energy density} &= 155 \text{ mAh/g}^a \times 80\%^b \times \frac{12.36 \text{ mg.cm}^{-2}}{(12.36^c + 12.36^c) \text{ mg.cm}^{-2} + (6.97^d + 1.77^e) \text{ mg.cm}^{-2}} \times 3.45^f - 0.15^h \text{ V} \\ &= 151.16 \text{ Ah/kg} \end{aligned}$$

**Note:** The nominal voltage of the full cell can be approximately calculated from the difference potential between the nominal voltages achieved from the half-cell testing of each anode and cathode electrode material relative to the Li/Li<sup>+</sup> metal. **a** is the theoretical capacity of LFP cathode based on ref.<sup>1</sup> **b** is the active material ratio within the electrode mixture that is typically prepared from active material of 80 wt%. **c** is the approximate mass loading of cathode and anode material based on ref.<sup>2</sup> **d** is the approximate areal weight of the common aluminum foil current collector. **e** is the approximate areal weight of the common copper foil current collector. **f** is the average plateau voltage from half-cell testing of LFP VS. Li/Li<sup>+</sup> based on ref.<sup>3</sup> **g** is the average plateau voltage from half-cell testing of 5MnO<sub>2</sub>/NBGC anode VS. Li/Li<sup>+</sup> of this work. **h** is the average plateau voltage from half-cell testing of graphite anode VS. Li/Li<sup>+</sup> based on ref.<sup>4</sup>

#### References

1. Y. Son, H. Cha, C. Jo, A. S. Groombridge, T. Lee, A. Boies, J. Cho and M. De Volder, *Materials Today Energy*, 2021, **21**.
2. B. Rowden and N. Garcia-Araez, *Energy Reports*, 2021, **7**, 97-103.
3. H. Sharifi, B. Mosallanejad, M. Mohammadzad, S. M. Hosseini-Hosseiniabad and S. Ramakrishna, *Ionics*, 2021, **28**, 213-228.
4. S. Li, Q. Meng, M. Fan, K. Yang and G. Tian, *Ionics*, 2020, **26**, 4443-4454.
